# Supplementary material for: Functional Characterization of a Global Virulence Regulator Hfq and Identification of Hfq-Dependent sRNAs in the Plant Pathogen Pantoea ananatis
Source: Front Microbiol. 2019 Sep 11;10:2075. doi: 10.3389/fmicb.2019.02075 (PMC6749038; doi:10.3389/fmicb.2019.02075)
Supplement: TABLE S3 — A list of sRNAs that has significant abundance difference between WT and hfq mutant strains of Pantoea ananatis. [file Table_3.XLSX]

## Sheet: Sheet1
Table S3: A list of sRNAs that has significant abundance difference between wt and hfq mutant strains of Pantoea ananatis
sRNA Locus	LOG2(∆hfq/wt) Timepoint 1	LOG2(∆hfq/wt) Timepoint 2	codea
pPAR510	-6.31499	-1.89236	T1
pPAR777	-	-6.25025	T1 T2
pPAR205	-4.56102	-6.01771	T1 T2
pPAR063	-5.77985	-4.7408	T1 T2
pPAR406	-5.6002	-5.63936	T1 T2
pPAR675	-3.79234	-5.38579	T1 T2
pPAR645	0.810456	-5.1496	T2
pPAR694	-3.72858	-4.99624	T1 T2
pPAR677	-2.38729	-4.31555	T1 T2
pPAR643	1.01149	-4.22928	T2
pPAR319	-3.06997	-4.12126	T1 T2
pPAR732	-1.8628	-3.99492	T1 T2
pPAR021	-3.87472	-2.74134	T1 T2
pPAR720	-1.44841	-3.84714	T2
pPAR639	-1.3057	-3.68589	T2
pPAR143	-1.28897	-3.66002	T2
pPAR785	-0.974504	-3.55124	T2
pPAR458	-3.52174	-2.79638	T1 T2
pPAR764	-1.12379	-3.52163	T2
pPAR638	-2.37907	-3.50014	T1 T2
pPAR537	-3.41204	-0.51795	T1
pPAR242	-2.84635	-3.35176	T1 T2
pPAR464	-3.28878	-0.480261	T1
pPAR175	-3.21269	-1.57623	T1
pPAR311	-2.58662	-3.17671	T1 T2
pPAR070	-3.02678	-2.44332	T1 T2
pPAR680	-3.02499	-2.86609	T1 T2
pPAR719	-1.16305	-2.98783	T2
pPAR584	-2.96401	-0.485543	T1
pPAR697	-0.0563996	-2.91552	T2
pPAR397	-2.2379	-2.90608	T1 T2
pPAR690	0.000114375	-2.9015	T2
pPAR739	-2.88584	-2.44424	T1 T2
pPAR244	-2.2491	-2.83855	T1 T2
pPAR282	-2.34711	-2.77326	T1 T2
pPAR154	0.791385	-2.68848	T2
pPAR748	-0.605866	-2.64154	T2
pPAR466	-2.62784	-2.62354	T1 T2
pPAR127	-2.59557	-2.05788	T1 T2
pPAR016	-1.28715	-2.55308	T1 T2
pPAR237	-2.51967	-0.992586	T1
pPAR593	-2.51848	0.889939	T1
pPAR052	-2.50321	-0.64405	T1
pPAR709	-0.0612459	-2.49596	T2
pPAR227	-2.48898	-1.64583	T1 T2
pPAR329	-2.15971	-2.44612	T1 T2
pPAR151	-0.844754	-2.43868	T2
pPAR284	-2.15487	-2.35576	T1 T2
pPAR296	-1.60906	-2.35361	T1 T2
pPAR682	1.03338	-2.34202	T2
pPAR083	-1.14832	-2.2629	T2
pPAR455	-2.20274	-2.2198	T1 T2
pPAR474	-0.74672	-2.21966	T2
pPAR161	-2.2058	-1.57618	T1 T2
pPAR017	-0.813201	-2.17103	T2
pPAR635	-0.188708	-2.07034	T2
pPAR159	-2.02386	-1.17346	T1
pPAR686	0	-2.02022	T2
pPAR470	-2.0013	-0.509693	T1
pPAR199	-1.9678	-0.481951	T1
pPAR157	-1.62531	-1.93584	T1 T2
pPAR395	-1.14244	-1.90756	T2
pPAR644	0.176937	-1.89445	T2
pPAR725	-0.732051	-1.8824	T2
pPAR417	-0.788047	-1.88204	T2
pPAR520	-1.87865	-0.692238	T1
pPAR718	1.14922	-1.86086	T2
pPAR379	-1.44415	-1.84512	T1 T2
pPAR163	-0.986067	-1.83946	T2
pPAR716	0.744531	-1.82314	T2
pPAR071	0.0177089	-1.81593	T2
pPAR653	-0.311973	-1.79598	T2
pPAR460	-0.436612	-1.77943	T2
pPAR144	-1.62549	-1.7783	T1 T2
pPAR771	-1.77587	-1.43192	T1 T2
pPAR478	-0.585691	-1.76573	T2
pPAR365	0.151933	-1.75411	T2
pPAR623	-1.71139	-0.647225	T1
pPAR266	-0.876042	-1.71062	T2
pPAR211	-0.403729	-1.70075	T2
pPAR681	0.548969	-1.66313	T2
pPAR345	-1.07714	-1.65054	T1 T2
pPAR289	-1.49581	-1.63188	T1 T2
pPAR389	-0.95149	-1.62229	T2
pPAR247	-1.60551	-0.287105	T1
pPAR667	1.00001	-1.60062	T2
pPAR473	-1.59682	-0.773034	T1
pPAR445	-0.604069	-1.58414	T2
pPAR616	-1.57333	0.411397	T1
pPAR773	0.512241	-1.57248	T2
pPAR177	-1.55059	-0.173596	T1
pPAR471	-1.54717	-0.189884	T1
pPAR200	-1.54686	-1.43408	T1 T2
pPAR396	-1.53911	-1.05423	T1 T2
pPAR047	-0.847525	-1.5354	T2
pPAR264	-0.276396	-1.51517	T2
pPAR254	0.0402263	-1.50951	T2
pPAR238	-1.49705	0.781337	T1
pPAR026	0.137208	-1.46444	T2
pPAR198	0.324027	-1.45842	T2
pPAR558	-1.45404	-0.277467	T1
pPAR333	-0.956098	-1.44333	T2
pPAR041	-1.42493	-0.960417	T1
pPAR129	1.18133	-1.4142	T2
pPAR086	-0.597577	-1.39667	T2
pPAR400	-0.640868	-1.38857	T2
pPAR402	-0.374311	-1.38464	T2
pPAR452	-0.357538	-1.35344	T2
pPAR015	-0.350354	-1.32904	T2
pPAR134	0.262733	-1.31157	T2
pPAR252	-0.379369	-1.30202	T2
pPAR241	-1.30001	0.356736	T1
pPAR408	0.967707	-1.29282	T2
pPAR088	-1.28791	0.499839	T1
pPAR353	0.285048	-1.287	T2
pPAR457	-1.28307	-0.557404	T1
pPAR287	-1.26409	0.218046	T1
pPAR770	1.02644	-1.26194	T2
pPAR231	0.245708	-1.25897	T2
pPAR131	-0.513644	-1.25102	T2
pPAR007	-0.100614	-1.24014	T2
pPAR595	-1.23649	-0.690846	T1
pPAR339	-0.241839	-1.2331	T2
pPAR772	0.483647	-1.22804	T2
pPAR245	-0.193874	-1.22135	T2
pPAR790	-0.586546	-1.2202	T2
pPAR248	0.219894	-1.21339	T2
pPAR722	1.03354	-1.21023	T2
pPAR046	-0.143936	-1.20348	T2
pPAR103	-1.00496	-1.19687	T2
pPAR283	0.212765	-1.19406	T2
pPAR213	-0.945838	-1.18983	T2
pPAR331	-0.110059	-1.17393	T2
pPAR727	-0.667306	-1.15834	T2
pPAR485	0.924393	-1.15548	T2
pPAR499	0.130082	-1.15449	T2
pPAR222	-1.14664	2.66731	T1 T2
pPAR579	-1.14555	2.38853	T1 T2
pPAR279	-1.12436	-0.0817126	T1
pPAR292	1.13447	-1.11149	T1 T2
pPAR201	1.25654	-1.08222	T1 T2
pPAR073	-1.07977	0.848296	T1
pPAR215	-0.411959	-1.07165	T2
pPAR480	-1.0569	0.489654	T1
pPAR295	-0.228699	-1.00343	T2
pPAR285	0.579826	0.961858	T2
pPAR069	0.63933	0.986476	T2
pPAR031	0.670283	1.01981	T2
pPAR042	-0.322248	1.03941	T2
pPAR550	-1.04777	1.04381	T2
pPAR304	1.05542	0.588353	T1
pPAR313	0.918727	1.05874	T2
pPAR181	-0.0451174	1.06892	T2
pPAR051	0.221493	1.08194	T2
pPAR405	1.08252	0.0607453	T1
pPAR271	-0.783095	1.0926	T2
pPAR081	0.581585	1.14313	T2
pPAR137	0.176522	1.20143	T2
pPAR450	0.917152	1.21867	T2
pPAR556	1.03619	1.23275	T2
pPAR555	0.204322	1.23365	T2
pPAR597	0.112526	1.24106	T2
pPAR346	1.11838	1.26433	T1 T2
pPAR332	1.27494	0.785075	T1
pPAR183	1.28284	0.871378	T1
pPAR098	-0.729952	1.29634	T2
pPAR410	1.32074	0.010138	T1
pPAR257	0.47903	1.33026	T2
pPAR061	-0.879469	1.35545	T2
pPAR575	0.553213	1.36443	T2
pPAR420	0.186473	1.37634	T2
pPAR162	1.37875	0.453803	T1
pPAR323	1.32283	1.38911	T2
pPAR182	1.39371	0.575336	T1
pPAR387	1.39662	0.100345	T1
pPAR301	0.437247	1.40248	T2
pPAR120	-0.450131	1.41709	T2
pPAR590	0.013641	1.42343	T2
pPAR265	1.42533	0.205472	T1
pPAR153	1.42726	-0.0874176	T1
pPAR077	-0.645653	1.42889	T2
pPAR110	1.44258	0.482902	T1
pPAR600	0.780949	1.44293	T2
pPAR390	0.0424627	1.44594	T2
pPAR456	1.04022	1.45042	T1 T2
pPAR399	1.45209	1.00975	T1 T2
pPAR608	0.336845	1.45619	T2
pPAR735	1.46078	1.14248	T1 T2
pPAR122	0.0292932	1.48374	T2
pPAR524	0.422826	1.491	T2
pPAR102	0.627064	1.50931	T2
pPAR589	0.489924	1.52434	T2
pPAR366	1.52716	1.04173	T1 T2
pPAR109	1.53262	0.0820766	T1
pPAR484	1.53731	0.819811	T1
pPAR055	0.124251	1.56299	T2
pPAR766	1.57152	0.0239463	T1
pPAR068	1.00445	1.58399	T2
pPAR326	0.0927734	1.61109	T2
pPAR506	0.890354	1.61257	T2
pPAR564	1.61726	1.59019	T1 T2
pPAR337	1.12634	1.64219	T1 T2
pPAR641	0.772206	1.65	T2
pPAR695	1.66963	-0.54763	T1
pPAR008	0.924713	1.70521	T2
pPAR551	0.743998	1.70856	T2
pPAR358	1.71295	0.943759	T1
pPAR802	1.73069	-0.282244	T1
pPAR659	1.18039	1.74549	T2
pPAR355	1.74837	1.28538	T1 T2
pPAR440	1.46353	1.76368	T1 T2
pPAR341	0.297577	1.77034	T2
pPAR650	1.77851	-0.168129	T1
pPAR343	1.79301	1.0352	T1
pPAR775	1.80159	0.309435	T1
pPAR738	1.80351	-0.265014	T1
pPAR255	1.80748	1.38605	T1 T2
pPAR516	0.835226	1.82188	T2
pPAR541	-0.0836038	1.82252	T2
pPAR338	0.637183	1.83064	T2
pPAR753	1.85131	-0.941477	T1
pPAR546	0.311572	1.85415	T2
pPAR374	-0.782669	1.85988	T2
pPAR009	0.517414	1.86135	T2
pPAR392	0.591154	1.86627	T2
pPAR699	1.86874	-0.632658	T1
pPAR394	1.16116	1.87294	T2
pPAR535	0.586832	1.88771	T2
pPAR613	-0.188245	1.90318	T2
pPAR571	-0.597085	1.90578	T2
pPAR609	0.36217	1.96873	T2
pPAR372	1.21602	2.00156	T2
pPAR495	2.01283	2.05219	T1 T2
pPAR476	2.05562	1.56553	T1 T2
pPAR619	1.51628	2.05966	T2
pPAR469	1.35693	2.06707	T1 T2
pPAR202	0.715254	2.07821	T2
pPAR737	2.08226	-0.797665	T1
pPAR439	0.900752	2.09034	T2
pPAR599	0.457429	2.10398	T2
pPAR013	2.13229	0.362854	T1
pPAR742	2.15685	0.155688	T1
pPAR543	0.985411	2.17121	T2
pPAR549	0.912799	2.20014	T2
pPAR090	0.356482	2.22087	T2
pPAR401	0.754376	2.22421	T2
pPAR022	1.88442	2.24066	T1 T2
pPAR765	2.25882	-0.27262	T1
pPAR155	1.10008	2.25988	T1 T2
pPAR588	1.28377	2.31849	T1 T2
pPAR094	0.601251	2.32576	T2
pPAR207	1.0866	2.32618	T1 T2
pPAR557	-0.818792	2.32922	T2
pPAR581	-0.856069	2.35833	T2
pPAR407	2.40983	0.925834	T1
pPAR522	-1.90331	2.47846	T2
pPAR714	2.50044	1.51709	T1 T2
pPAR235	0.132283	2.50101	T2
pPAR610	0.441938	2.52732	T2
pPAR661	2.58973	0.880047	T1
pPAR273	0.794218	2.66113	T2
pPAR246	0.555351	2.66406	T2
pPAR433	0.515231	2.74264	T2
pPAR624	0.0517853	2.8839	T2
pPAR421	0.206574	3.07502	T2
pPAR547	-0.152815	3.1052	T2
pPAR196	1.81167	3.12068	T1 T2
pPAR251	0.55752	3.23713	T2
pPAR206	1.18736	3.36159	T1 T2
pPAR604	2.41226	3.37328	T1 T2
pPAR628	0.726452	3.4695	T2
pPAR542	0.8028	3.52585	T2
pPAR340	-0.264789	3.85718	T2
pPAR724	3.96881	2.9794	T1 T2
pPAR530	-0.590601	4.03761	T2
pPAR307	3.26918	5.82165	T1 T2
aT1 and T2 denote significant (adjusted P<0.05) difference between ∆hfq mutant and wild-type at timepoint 1 or timepoint 2, respectively.
