# Supplementary material for: Functional Characterization of a Global Virulence Regulator Hfq and Identification of Hfq-Dependent sRNAs in the Plant Pathogen Pantoea ananatis
Source: Front Microbiol. 2019 Sep 11;10:2075. doi: 10.3389/fmicb.2019.02075 (PMC6749038; doi:10.3389/fmicb.2019.02075)
Supplement: TABLE S4 — A list of predicted targets of selected sRNAs. [file Table_4.XLSX]

## Sheet: Target FnrS
sRNA	FnrS	GGTGAATGCAACGTCAAGCGATGGGCGTTGCGCTCCATATTGTCTTACTTCCTTTTTTGAATTATTGCATAGCATATTTAATTCGAAATACGCCGGCTAACTA
mRNA target prediction of FnrS
Rank	Gene	Product	Locus tag	Energy	P value	sRNA_start	sRNA_stop	mRNA_start	mRNA_stop
1	yjjL	MFS transporter	PANA_3801	-15.17	0.001	18	35	-21	-6
2	yhdX	Amino acid ABC transporter permease	PANA_3579	-14.95	0.001	17	34	2	20
3	aaeB	P-hydroxybenzoic acid efflux pump subunit AaeB	PANA_3556	-14.76	0.001	19	31	-57	-45
4	gcvP	Aminomethyl-transferring glycine dehydrogenase	PANA_3187	-13.75	0.002	1	17	-5	12
5	rapA	RNA polymerase-associated protein RapA	PANA_0689	-13.24	0.003	16	31	-59	-45
6	trpS	Tryptophanyl-tRNA synthetase	PANA_3662	-13.06	0.004	15	32	4	20
7	yccA	FtsH protease modulator YccA, binds to the HflBKC complex which modulates FtsH activity	PANA_1406	-13.03	0.004	26	37	-65	-54
8	ydcN	Helix-turn-helix transcriptional regulator	PANA_4179	-12.58	0.005	18	32	7	20
9	yddW	Glycoside hydrolase family 10 protein	PANA_1922	-12.37	0.006	22	34	5	17
10	argR	Transcriptional regulator ArgR	PANA_3549	-12.34	0.006	12	32	2	20
11	-	NUDIX domain-containing protein	PANA_1928	-12.17	0.007	41	57	-15	2
12	-	Hypothetical protein	PANA_1758	-12.08	0.007	57	73	-71	-54
13	ydfG	Bifunctional NADP-dependent 3-hydroxy acid dehydrogenase/3-hydroxypropionate dehydrogenase YdfG	PANA_1965	-12.05	0.007	19	38	-3	17
14	ygbK	four-carbon acid sugar kinase family protein, type III effector Hrp-dependent outers YgbK	PANA_0751	-11.87	0.008	16	31	-71	-57
15	yniA	Fructosamine-3-kinase	PANA_1691	-11.68	0.009	11	25	-51	-38
16	cybB	B-type di-heme cytochrome with a major alpha-absorption peak at 561 nm and a minor peak at 555 nm	PANA_1979	-11.62	0.009	19	33	-59	-45
17	fliY	Cystine ABC transporter substrate-binding protein	PANA_2261	-11.41	0.011	24	36	-69	-57
18	yejM	Inner membrane protein YejM	PANA_2581	-11.4	0.011	19	33	-39	-24
19	pyrD	quinone-dependent dihydroorotate dehydrogenase	PANA_1381	-11.19	0.012	10	25	-29	-15
20	pcm	Protein-L-isoaspartate O-methyltransferase	PANA_3044	-11.18	0.012	86	99	6	19
21	ompF	Outer membrane protein F precursor	PANA_1371	-11.17	0.012	22	39	3	20
22	-	Hypothetical protein	PANA_3819	-11.15	0.013	24	38	3	20
23	amsK	Amylovoran biosynthesis glycosyltransferase (exopolysaccaride/glycan biosynthesis)	PANA_2496	-11.14	0.013	39	58	-56	-38
24	-	Phosphatase PAP2 family protein	PANA_2511	-10.98	0.014	17	31	-79	-64
25	amsG	phosphatase PAP2 family protein (exopolysaccaride/glycan biosynthesis)	PANA_2506	-10.91	0.014	66	85	-10	8
26	yihD	DUF1040 family protein	PANA_3958	-10.5	0.018	12	26	7	20
27	aldA	Aldehyde dehydrogenase	PANA_0984	-10.49	0.018	17	33	2	19
28	gltA	Glutamate synthase	PANA_0418	-9.72	0.027	21	35	-41	-26
29	tcp	Methyl-accepting chemotaxis protein	PANA_3965	-9.55	0.029	86	101	-8	7
30	yidC	Membrane protein insertase YidC	PANA_0093	-9.45	0.03	19	38	1	20
31	ydcO	Benzoate/H(+) symporter BenE family transporter	PANA_1845	-9.39	0.031	12	32	-75	-55
32	mrp	Iron-sulfur cluster carrier protein ApbC	PANA_2532	-9.38	0.031	24	39	1	17
33	-	Steryl acetyl hydrolase	PANA_1594	-9.3	0.033	15	27	-21	-10
34	yiaJ	IclR family transcriptional regulator	PANA_0370	-9.29	0.033	42	54	-6	7
35	yccU	CoA-binding Protein YccU	PANA_1401	-9.25	0.033	17	32	-64	-51
36	yghB	Inner membrane protein YghB	PANA_3353	-9.24	0.033	40	54	-69	-55
37	phoU	Phosphate signaling complex protein PhoU	PANA_0036	-9.11	0.035	91	99	-68	-60
38	ygeA	Aspartate/glutamate racemase	PANA_4083	-8.94	0.038	21	32	-59	-48
39	ampG	Muropeptide MFS transporter AmpG	PANA_0992	-8.9	0.039	16	35	-64	-48
40	yeiB	Hypothetical protein	PANA_2543	-8.86	0.039	18	32	2	16
41	htpX	Protease HtpX	PANA_2156	-8.85	0.04	7	23	-80	-62
42	yihS	Sulfoquinovose isomerase	PANA_3495	-8.76	0.041	20	36	-14	3
43	yyaJ	MFS transporter	PANA_0303	-8.69	0.043	19	38	-75	-59
44	-	Hypothetical protein	PANA_1899	-8.6	0.044	22	40	-22	-2
45	ydhK	Fusaric Acid Resistance Protein	PANA_1741	-8.53	0.045	11	28	-68	-49
46	ydhD	Grx4 family monothiol glutaredoxin	PANA_1732	-8.5	0.046	1	11	-13	-2
47	yedA	Transporter drug/metabolite exporter permease family protein	PANA_1411	-8.47	0.046	1	17	-64	-47
48	sppA	Signal peptide peptidase SppA	PANA_2104	-8.29	0.05	29	43	-5	10
*Locus tag of Pantoea ananatis LMG20103

## Sheet: Target GlmZ
sRNA	GlmZ	GTAGATGCTCATTCCACCTCTTATGTTTGCTTCGGCTACATAAACCTGGGAATGACGCAGAGCCAATTTTGGGTACCTGTTGTCTGCCTGCCTGTATCGCGAAAGTCTTACAGGGTTATCAGACACCACGTTGAGTCGGGTACCTCTCGGTTGTCTAACCGACCTGATCTTACACCTGCTTTTAGCAGGT
mRNA target prediction of GlmZ
Rank	Gene	Product	Locus tag	Energy	Pvalue	sRNA_start	sRNA_stop	mRNA_start	mRNA_stop
1	ydgJ	Oxidoreductase Gfo/Idh/MocA Family	PANA_1829	-15.88	0	5	16	-4	8
2	ada	AraC family transcriptional regulator	PANA_0276	-14.88	0.001	6	21	-4	11
3	znuC	Zinc ABC transporter ATP-binding protein ZnuC	PANA_2198	-14.21	0.001	44	60	-58	-42
4	yaaU	MFS transporter	PANA_1933	-14	0.002	1	15	-68	-53
5	kdpF	K(+)-transporting ATPase subunit F	PANA_3791	-13.5	0.003	33	51	-12	8
6	fba	Fructose bisphosphate aldolase	PANA_3364	-13.42	0.003	23	36	-80	-68
7	phoP	Two-component system response regulator PhoP	PANA_1512	-12.66	0.005	48	65	-80	-65
8	yagG	MFS transporter	PANA_1085	-12.49	0.005	8	22	-77	-62
9	yceG	Aminodeoxychorismate Lyase, cell division protein	PANA_1487	-11.99	0.008	25	42	-1	16
10	ynfL	LysR family transcriptional regulator	PANA_1976	-11.97	0.008	52	61	12	20
11	yjjA	Glycoprotein/Receptor	PANA_0518	-11.65	0.009	27	38	-32	-20
12	emrA	Multidrug resistance/export protein	PANA_2738	-10.75	0.016	56	64	-76	-68
13	-	Hypothetical protein	PANA_3172	-10.33	0.02	53	64	-66	-55
14	yajO	Aldo/keto reductase	PANA_0375	-10.25	0.021	24	38	-77	-62
15	ydjR	HutD family protein, hypothetical protein	PANA_1267	-10.05	0.023	23	37	-54	-42
16	yedY	protein-methionine-sulfoxide reductase catalytic subunit	PANA_3568	-9.9	0.025	24	42	-69	-51
17	mrdA	Penicillin-binding protein 2	PANA_3297	-9.84	0.025	26	42	-51	-36
18	-	Hypothetical protein	PANA_2733	-9.79	0.026	52	61	-59	-50
19	-	DUF943 family protein	PANA_3930	-9.36	0.032	26	40	-17	-3
20	-	Hypothetical protein	PANA_2292	-9.29	0.033	21	40	-11	8
21	ybjL	Transporter protein	PANA_1307	-9.25	0.033	52	63	-14	-3
22	gdhA	Glutamate dehydrogenase	PANA_3966	-9.21	0.034	45	59	-53	-38
23	yjbQ	YjbQ family protein	PANA_0268	-9.18	0.034	42	55	-73	-59
24	-	Hypothetical protein	PANA_1541	-9.15	0.035	10	21	-62	-51
25	dnaQ	DNA polymerase III epsilon subunit	PANA_0830	-8.98	0.038	1	20	-7	12
26	ygbI	DeoR/GlpR transcriptional regulator	PANA_2460	-8.78	0.041	8	21	-4	11
27	cinB	Alpha/beta hydrolase	PANA_2842	-8.68	0.043	18	31	-21	-8
28	araF	Arabinose ABC transporter substrate-binding protein	PANA_1825	-8.67	0.043	1	16	-11	5
29	pncA	Bifunctional nicotinamidase/pyrazinamidase	PANA_2106	-8.65	0.043	18	35	-15	1
30	yfeR	LysR family transcriptional regulator	PANA_2756	-8.57	0.045	52	63	10	20
31	cndP1	Glutamate carboxypeptidase-like protein 2 precursor	PANA_3275	-8.56	0.045	17	35	-10	8
32	rbsB	D-ribose-binding periplasmic protein precursor	PANA_1667	-8.46	0.047	56	64	2	10
33	crr	PTS glucose transporter subunit IIA	PANA_2765	-8.44	0.047	56	64	-53	-45
34	yqjC	DUF1090 domain-containing protein	PANA_3461	-8.31	0.05	24	38	-7	8
*Locus tag of Pantoea ananatis LMG20103

## Sheet: Target pPAR237
sRNA	pPAR 237	ACAATCAGGTGTGGGAAAGCGAAGGTAAATGTTTGTACAAATGTTTCTGGGATGTTACTCTGAGTGTCCCGGCCAGCATCACTTTATAGTTTGTGAAGTCTGGCCGGAAAGTTTTTCCCTGGTGTTGGCTGTTTCAGCGACCTGGCCTTGCAGGTCAGGTTTTTTTTT
mRNA target prediction of pPAR 237
Rank	Gene	Product	Locus tag	Energy	Pvalue	sRNA_start	sRNA_stop	mRNA_start	mRNA_stop
1	ycbX	MOSC domain-containing protein	PANA_1383	-17.81	0	10	22	7	19
2	perM	Putative permease	PANA_2810	-16.89	0	7	20	-63	-50
3	arnA	Bifunctional polymyxin resistance ArnA protein (UDP-4-amino-4-deoxy-L-arabinose)	PANA_4004	-16.47	0	92	109	-77	-59
4	-	Putative haloacid dehalogenase type II	PANA_2414	-15.47	0	4	15	-30	-19
5	-	Putative ABC-Type Sugar Transport System Periplasmic protein	PANA_0367	-14.71	0.001	114	129	-22	-6
6	yohF	SDR family oxidoreductase	PANA_1240	-13.7	0.002	97	110	-76	-64
7	amiC	N-acetylmuramoyl-L-alanine amidase	PANA_0644	-13.48	0.003	136	152	-56	-41
8	-	Hypothetical protein	PANA_0579	-13.18	0.003	114	130	-24	-7
9	msrB	Peptide-methionine (R)-S-oxide reductase	PANA_2109	-13.04	0.004	44	62	-26	-8
10	ppa	Inorganic pyrophosphatase	PANA_3069	-12.56	0.005	7	26	-58	-40
11	pqqB	Pyrroloquinoline quinone biosynthesis protein	PANA_1854	-12.55	0.005	143	159	-55	-42
12	pitA	Inorganic phosphate transporter	PANA_3764	-12.54	0.005	8	25	-47	-31
13	sfcA	NAD-dependent malic enzyme	PANA_2537	-12.5	0.005	92	108	-79	-61
14	csgA	SDR family oxidoreductase	PANA_3752	-11.95	0.008	91	108	-78	-61
15	-	Hypothetical protein	PANA_0007	-11.8	0.009	92	108	-60	-44
16	malE	Maltose/maltodextrin ABC transporter substrate-binding protein	PANA_1911	-11.7	0.009	134	150	-80	-64
17	foxA	TonB-dependent siderophore receptor	PANA_4210	-11.55	0.01	45	65	-68	-49
18	yieN	ATPase RavA	PANA_0013	-11.47	0.01	8	22	-77	-62
19	proW	Glycine betaine/L-proline transport system permease	PANA_0589	-11.46	0.011	4	17	-54	-41
20	holE	DNA polymerase III subunit theta	PANA_2185	-11.29	0.012	135	154	-16	5
21	mprA	DNA-binding transcriptional repressor of microcin B17 synthesis and multidrug efflux; negative regulator of the multidrug operon emrAB	PANA_2997	-11.25	0.012	141	155	-56	-41
22	hifC	Outer membrane usher protein HifC precursor	PANA_1522	-10.99	0.014	114	129	-25	-9
23	yjeF	Bifunctional ADP-dependent NAD(P)H-hydrate dehydratase/NAD(P)H-hydrate epimerase	PANA_3542	-10.79	0.015	143	161	-80	-61
24	X	Tail protein X	PANA_3416	-10.57	0.017	8	27	-80	-62
25	glnS	Glutamine-tRNA ligase	PANA_1149	-10.5	0.018	136	152	-21	-3
26	cex	Putative exoglucanase/xylanase precursor	PANA_0376	-10.44	0.019	148	164	-49	-32
27	ygjE	DASS family sodium-coupled anion symporter, putative tartrate carrier	PANA_4118	-10.42	0.019	62	74	-45	-33
28	yhhQ	7-cyano-7-deazaguanine/7-aminomethyl-7-deazaguanine transporter	PANA_3732	-10.19	0.021	111	131	-74	-55
29	crr	PTS glucose transporter subunit IIA	PANA_2765	-10.18	0.021	70	81	-36	-25
30	mcpB	PAS domain S-box protein, methyl accepting chemotaxis protein	PANA_3263	-9.9	0.025	134	145	-56	-45
31	gabD	NAD-dependent succinate-semialdehyde dehydrogenase	PANA_3555	-9.8	0.026	149	161	-41	-29
32	-	Hypothetical protein	PANA_1424	-9.78	0.026	91	107	-47	-31
33	yobA	Copper homeostasis periplasmic binding protein	PANA_2184	-9.6	0.028	64	78	-80	-67
34	-	Putative glycoside hydrolase family 127 protein	PANA_2811	-9.59	0.028	142	160	-63	-45
35	-	Hypothetical protein	PANA_1526	-9.38	0.031	120	133	-28	-15
36	ppdA	Prepilin peptidase dependent protein A precursor	PANA_3113	-9.37	0.031	126	139	-80	-68
37	tssM	Type VI secretion system membrane subunit TssM	PANA_1655	-9.34	0.032	4	18	-44	-30
38	tcp	Methyl-accepting chemotaxis citrate transducer	PANA_3261	-9.26	0.033	110	125	-15	1
39	yckA	Probable amino-acid ABC transporter permease	PANA_4057	-8.62	0.044	114	133	-27	-8
40	-	Acireductone synthase	PANA_0872	-8.49	0.046	127	142	-80	-64
41	-	DUF2474 domain-containing protein	PANA_3244	-8.39	0.048	136	151	2	19
42	frr	Ribosome recycling factor	PANA_0795	-8.32	0.049	138	148	-33	-23
*Locus tag of Pantoea ananatis LMG20103

## Sheet: Target pPAR238
sRNA	pPAR238	AGCGGTAAAAAAAAACCTGACCTGCAAGGCCAGGTCGCTGAAACAGCCAACACCAGGGAAAAACTTTCCGGCCAGACTTCACAAACTATAAAGTGATGCTGGCCGGGACACTCAGAGTAACATCCCAGAAACATTTGTA
mRNA target prediction of pPAR 238
Rank	Gene	Product	Locus tag	Energy	Pvalue	sRNA_start	sRNA_stop	mRNA_start	mRNA_stop
1	yohF	SDR family oxidoreductase	PANA_1240	-20.09	0	96	110	-77	-63
2	tauA	Taurine ABC transporter substrate-binding protein	PANA_3646	-16.68	0	91	109	-32	-15
3	yafD	Endonuclease/exonuclease/phosphatase family protein	PANA_0825	-16.21	0	98	109	8	19
4	-	Hypothetical protein	PANA_3279	-15.7	0	92	107	-80	-67
5	fliF	Flagellar M-ring protein	PANA_2295	-14.09	0.002	15	27	-68	-56
6	uvrD	DNA helicase II	PANA_0169	-13.58	0.002	91	104	-74	-61
7	lldR	Putative L-lactate dehydrogenase operon regulatory protein	PANA_0924	-13.24	0.003	50	65	-21	-5
8	-	Hypothetical protein	PANA_1542	-13.08	0.004	97	111	-50	-36
9	lolA	Outer membrane lipoprotein chaperone	PANA_1342	-12.81	0.004	26	41	-59	-45
10	ycaD	MFS-type transporter protein	PANA_1345	-12.48	0.005	27	39	2	15
11	atpD	F0F1 ATP synthase subunit beta	PANA_0027	-12.44	0.006	92	105	-62	-49
12	yeeO	EmmdR/YeeO family multidrug/toxin efflux MATE transporter	PANA_2374	-11.61	0.01	97	109	8	20
13	yjhB	MFS transporter	PANA_0037	-11.24	0.012	91	108	-59	-42
14	mltB	membrane-bound lytic murein transglycosylase B; catalyzes the cleavage of the glycosidic bonds between N-acetylmuramic acid and N-acetylglucosamine in peptidoglycan	PANA_3038	-10.97	0.014	45	60	-32	-18
15	rpe	Ribulose-phosphate 3-epimerase	PANA_3664	-10.41	0.019	95	110	-47	-31
16	glgX	Glycogen debranching protein Glg	PANA_1750	-10.31	0.02	16	26	-58	-48
17	yohK	CidB/LrgB family autolysis modulator	PANA_2535	-10.29	0.02	21	41	-72	-52
18	yfcI	Putative transposase, Rpn family recombination-promoting nuclease	PANA_4113	-9.9	0.025	15	31	-22	-5
19	sgcQ	Photosystem I Assembly BtpA	PANA_0511	-9.85	0.025	95	109	-52	-39
20	yncC	GntR family transcriptional regulator	PANA_0840	-9.82	0.025	15	33	-68	-49
21	yncD	TonB-dependent receptor	PANA_1849	-9.75	0.026	27	44	-26	-11
22	pdxJ	Pyridoxine 5'-phosphate synthase	PANA_2890	-9.71	0.027	25	39	-65	-51
23	sfcA	NAD-dependent malic enzyme	PANA_2537	-9.6	0.028	92	107	-79	-61
24	gabD	NAD-dependent succinate-semialdehyde	PANA_2416	-9.42	0.031	67	77	-76	-66
25	yibD	Glycosyltransferase	PANA_3891	-9.4	0.031	68	78	-65	-55
26	-	Hypothetical membrane protein	PANA_0559	-9.35	0.032	91	107	-23	-5
27	uidR	TetR/AcrR family transcriptional regulator (repressor)	PANA_1528	-9.3	0.033	103	118	-15	1
28	-	Hypothetical protein	PANA_3292	-9.27	0.033	64	75	-52	-41
29	mltC	Membrane-bound lytic murein transglycosylase C	PANA_3237	-9.26	0.033	15	30	-27	-12
30	yedX	Hydroxyisourate hydrolase	PANA_0867	-9.21	0.034	53	70	-13	4
31	pntB	Re/Si-specific NAD(P)(+) transhydrogenase subunit beta	PANA_1994	-9.1	0.036	93	104	-73	-62
32	yibF	Glutathione S-transferase	PANA_0104	-9.09	0.036	50	61	-19	-8
33	ygjO	23S rRNA (guanine(1835)-N(2))-methyltransferase	PANA_3449	-9.02	0.037	101	114	-39	-26
34	yeeI	Inner Membrane Protein; Mlc anti-repressor, regulates ptsG by binding and inactivating Mlc	PANA_2326	-8.9	0.039	92	104	-18	-6
35	cex	Putative exoglucanase/xylanase precursor	PANA_0376	-8.65	0.043	22	36	-46	-32
36	apt	Adenine phosphoribosyltransferase	PANA_1027	-8.35	0.049	45	59	-5	9
37	coaBC	bifunctional phosphopantothenoylcysteine decarboxylase/phosphopantothenate-cysteine ligase CoaBC	PANA_3905	-8.32	0.049	51	70	-26	-6
*Locus tag of Pantoea ananatis LMG20103

## Sheet: Target pPAR395
sRNA	pPAR 395	ACTGGCGACAATTCAGATGGTGAACTAATTTAAAAACGCTGTTTGGAAGTCATTYAGGATTTCCCTGAGAACTCCGGCCCGACCCTTTAACGAGGTGCGGGCATTT
mRNA target prediction of pPAR 395
Rank	Gene	Product	Locus tag	Energy	P value	sRNA_start	sRNA_stop	mRNA_start	mRNA_stop
1	yicJ	Inner membrane symporter, MFS transporter	PANA_2812	-14.86	0.001	36	54	-8	11
2	-	Hypothetical protein	PANA_2514	-14.62	0.001	86	97	8	20
3	-	Hypothetical protein	PANA_1112	-13.7	0.002	69	81	-80	-67
4	aqpZ	Aquaporin Z	PANA_2219	-13.5	0.003	84	96	-49	-37
5	yibQ	Periplasmic protein, divergent polysaccharide deacetylase family protein	PANA_3883	-13.3	0.003	8	23	2	17
6	thiI	Thiamine biosynthesis protein	PANA_0979	-13.12	0.003	84	96	-76	-63
7	perM	Putative permease	PANA_2810	-13.01	0.004	86	95	-59	-50
8	sardH	Sarcosine dehydrogenase, mitochondrial precursor	PANA_1939	-12.98	0.004	86	99	-2	12
9	mocC	TIM barrel protein	PANA_1626	-12.57	0.005	86	99	-74	-60
10	codA	Cytosine deaminase	PANA_3661	-12.4	0.006	86	94	7	15
11	arcA	Two-component system response regulator, aerobic respiration control protein	PANA_0653	-12.3	0.006	84	95	8	20
12	yedQ	GGDEF domain-containing protein	PANA_1637	-12	0.007	84	97	-16	-3
13	qseC	Two-component system sensor histidine kinase	PANA_0011	-11.62	0.01	86	95	-44	-35
14	nhaA	Na+/H+ antiporter	PANA_0665	-11.35	0.011	78	96	1	20
15	nikB	ABC transporter permease	PANA_4182	-10.9	0.015	83	96	-59	-47
16	dsdC	LysR family transcriptional regulator, HTH-type transcriptional regulator DsdC	PANA_0854	-10.82	0.015	86	99	-2	12
17	sirA	Sulfurtransferase TusA	PANA_3731	-10.67	0.016	1	16	-20	-5
18	glnQ	Glutamine ABC transporter ATP-binding protein	PANA_1280	-10.65	0.017	83	96	-31	-19
19	pleD	GGDEF domain-containing response regulator protein	PANA_3296	-10.56	0.018	84	98	-2	13
20	yedD	Lipoprotein	PANA_2286	-10.55	0.018	84	96	-66	-52
21	-	Hypothetical protein	PANA_3340	-10.54	0.018	68	76	-47	-39
22	nudH	RNA pyrophosphohydrolase	PANA_3117	-10.48	0.018	84	96	-80	-69
23	copA	Copper-exporting P-type ATPase CopA	PANA_1042	-10.47	0.018	84	95	-28	-17
24	sapF	Peptide ABC transporter ATP-binding protein	PANA_2034	-10.41	0.019	82	96	-37	-24
25	rbsB	Sugar ABC transporter substrate-binding protein	PANA_0509	-10.31	0.02	84	97	-32	-20
26	nagE	PTS N-acetylglucosamine transporter subunit, phosphoenolpyruvate-dependent sugar phosphotransferase system	PANA_1148	-10.31	0.02	68	83	-15	-1
27	phoR	Phosphate regulon sensor histidine kinase part of the two-component phosphate regulatory system phoR/phoB	PANA_0954	-10.1	0.022	84	97	-28	-16
28	htpX	Protease HtpX	PANA_2156	-9.99	0.023	87	95	-69	-61
29	xynB	Alpha/beta hydrolase	PANA_0136	-9.87	0.025	29	43	-22	-8
30	fliP	Flagellar type III secretion system pore protein	PANA_2305	-9.82	0.026	86	94	-77	-69
31	rne	Ribonuclease E	PANA_1475	-9.8	0.026	84	98	-48	-34
32	-	Nucleotidyltransferase	PANA_2751	-9.45	0.03	84	95	-56	-44
33	ygaM	DUF883 family protein	PANA_2988	-9.31	0.032	74	94	-22	-4
34	rph	Ribonuclease PH	PANA_3909	-9.29	0.033	64	72	-14	-6
35	yeiB	DUF418 family protein, hypothetical protein	PANA_2543	-9.2	0.034	82	96	1	18
36	xerC	Tyrosine recombinase XerC	PANA_0167	-9.02	0.037	65	77	-79	-66
37	qor	Quinone oxidoreductase	PANA_0263	-8.99	0.037	80	94	-58	-44
38	-	Hypothetical protein	PANA_2126	-8.94	0.038	84	94	-27	-17
39	fbaA	Ketose 1,6-bisphosphate aldolase	PANA_2380	-8.74	0.042	86	94	-57	-49
40	yhiR	23S rRNA (adenine(2030)-N(6))-methyltransferase	PANA_3769	-8.74	0.042	68	76	-51	-43
41	yccX	acylphosphatase	PANA_1404	-8.69	0.042	29	39	-20	-10
42	rof	Rho-binding antiterminator, suppresses temperature-sensitive mutations in essential genes by modulating rho-dependent transcription termination	PANA_0814	-8.68	0.043	53	64	-51	-40
43	-	Hypothetical protein	PANA_2734	-8.61	0.044	33	52	-6	14
44	-	Terminase small subunit	PANA_1063	-8.6	0.044	21	35	-58	-44
45	tsx	Nucleoside-specific channel-forming protein Tsx	PANA_0306	-8.55	0.045	29	45	-31	-14
46	yeiR	GTP-binding protein	PANA_4184	-8.53	0.045	27	43	-79	-63
47	cynX	MFS transporter	PANA_0922	-8.48	0.046	30	44	-76	-62
48	npdA	NAD-dependent protein deacylase	PANA_1508	-8.39	0.048	82	96	1	16
49	yeaB	CoA pyrophosphatase	PANA_2141	-8.37	0.048	86	97	-27	-16
*Locus tag of Pantoea ananatis LMG20103
